# Supplementary material
Source: MDPI journal article supplement (https://www.mdpi.com/1424-8247/17/1/108)
Supplement: s1 [file s1]

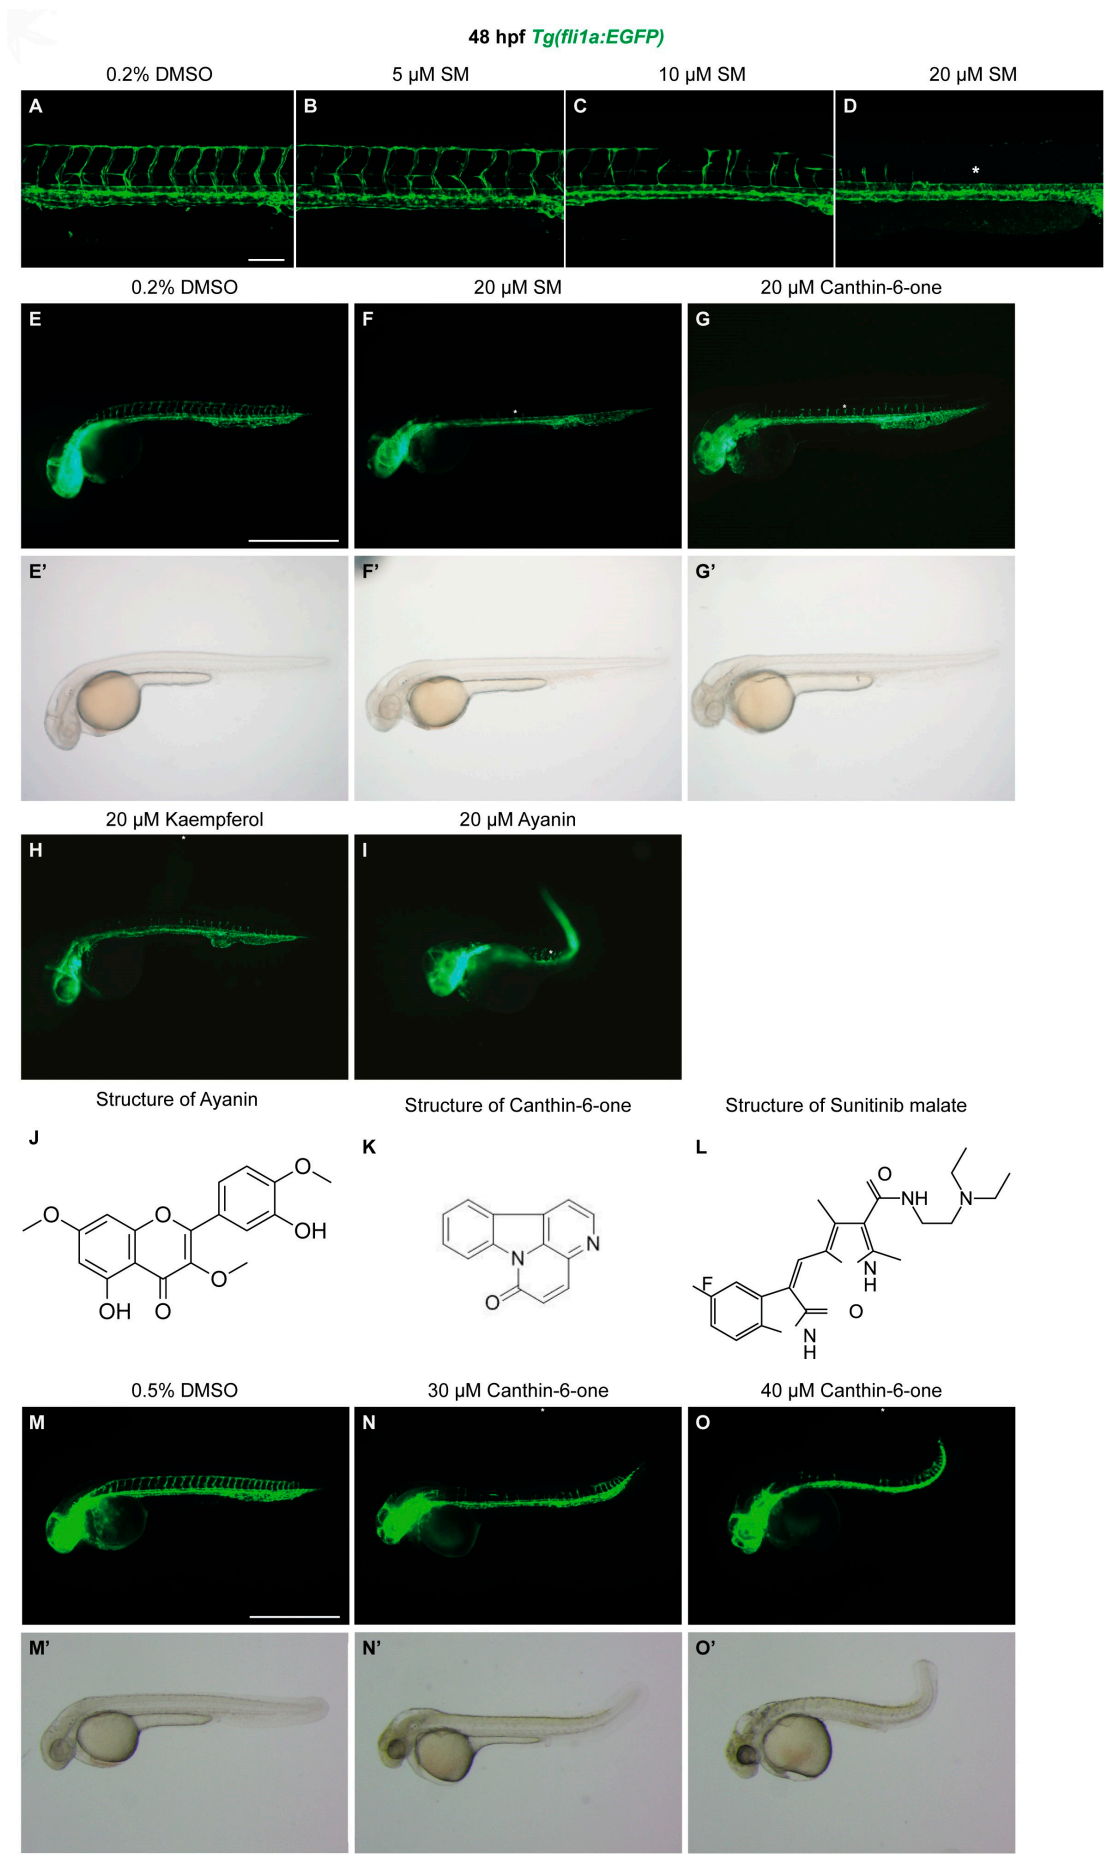

**Figure S1.** Canthin-6-one, kaempferol, and ayanin at 20  $\mu$ M inhibit developmental angiogenesis in zebrafish. (A–D) Lateral confocal images of 48 hpf *Tg(fli1a:EGFP)* embryos treated with 0.2% DMSO (n = 16, A) or sunitinib malate (SM) at either 5  $\mu$ M (n = 17, B), 10  $\mu$ M (n = 15, C), or 20  $\mu$ M (n=20, D). Only SM at 20  $\mu$ M completely inhibits ISV development. (E–I) Lateral fluorescent (E–I) and trans-light images (E'–G') of 48 hpf *Tg(fli1a:EGFP)* embryos treated with either 0.2% DMSO (E,E'), 20  $\mu$ M sunitinib malate (SM, F,F'), 20  $\mu$ M canthin-6-one (G,G'), 20  $\mu$ M kaempferol (H), or 20  $\mu$ M ayanin (I). White asterisks indicate lack of intersegmental vessels (ISVs). (J–L) Structure of ayanin (J), canthin-6-one (K), or SM (L). (M–O') Lateral fluorescent (M–O) and trans-light images (M'–O') of 48 hpf *Tg(fli1a:EGFP)* embryos treated with 0.5% DMSO (n = 20, M,M') or canthin-6-one at either 30  $\mu$ M (n=17, N,N') or 40  $\mu$ M (n=18, O,O'). Scale Bars: 100  $\mu$ m for (A) and 1 mm for (E) and (M).

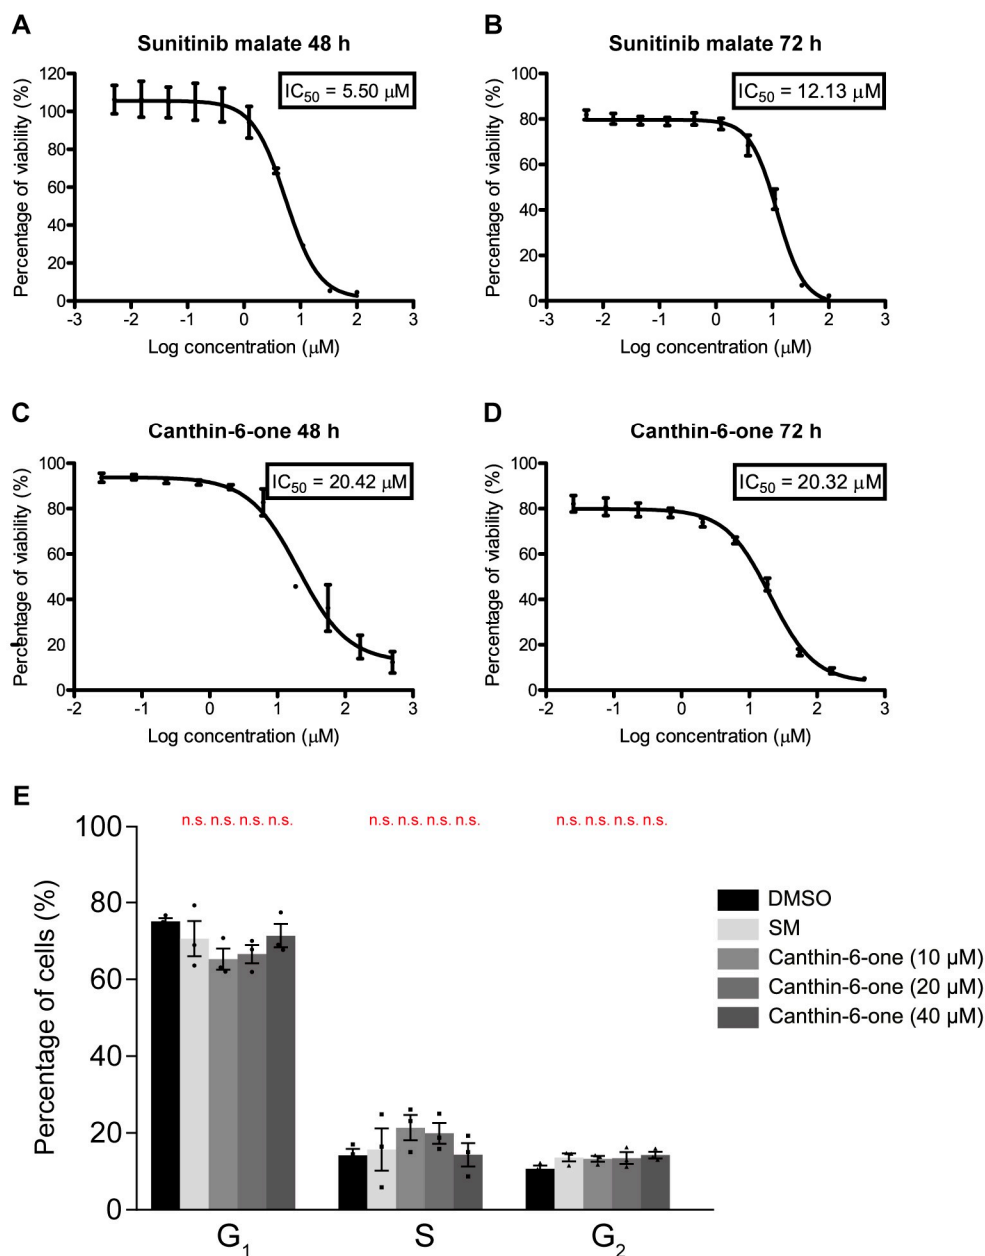

**Figure S2.** Canthin-6-one impairs HUVEC viability and proliferation. (A–D) Cell viability plot of HUVECs treated with either sunitinib malate (SM, A,B) or canthin-6-one (C,D) at 0.05 to 1000  $\mu$ M for 48 h (A,C) or 72 h (B,D, n = 3). (E) Bar chart showing percent-age of HUVECs treated with either DMSO, SM, or canthin-6-one at indicated concentrations in G0/G1, S, or G2/M phase (n = 3). While not significant, canthin-6-one treatment at all concentrations showed a marginal increase of percentage of HUVECs in G2/M phase. Statistical test: Kruskal-Wallis test was conducted for graph (E).  $p > 0.05$  (not significant, n.s.).

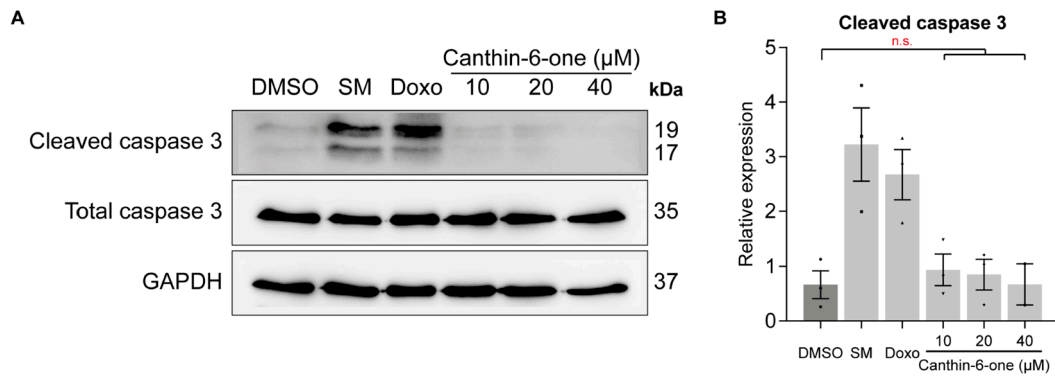

**Figure S3.** Canthin-6-one does induce endothelial cell apoptosis. **(A)** Western blot analysis of lysates isolated from HUVECs treated with either 0.2% DMSO, 10  $\mu\text{M}$  sunitinib malate (SM), 500 nM doxorubicin, or canthin-6-one at indicated concentrations for 1 h ( $n = 3$ ). Protein levels of cleaved caspase 3, total caspase 3, and GAPDH were assessed. The full-length blots are presented in Figure S4. **(B)** Densitometry analysis of cleaved caspase 3 protein levels from western blot analysis in image (A). Cleaved caspase 3 protein level was normalised to total caspase 3 protein level. Statistical test: Kruskal-Wallis test was conducted for graph (B).  $p > 0.05$  (not significant, n.s.).

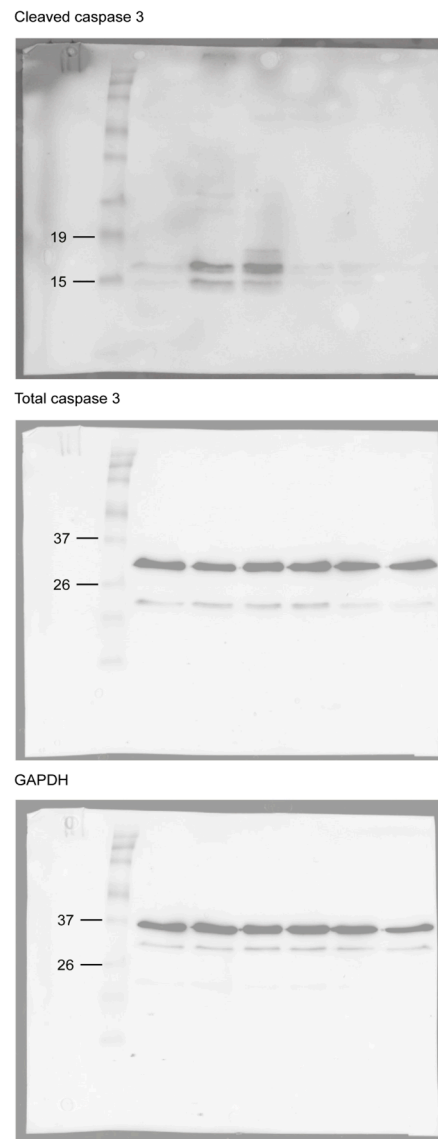

**Figure S4.** Original western blot images of Figure S3A. Images were taken using the Bio-Rad ChemiDoc Imaging system (Bio-Rad, CA, USA). Original western blot images were processed using the Fiji image processing software.

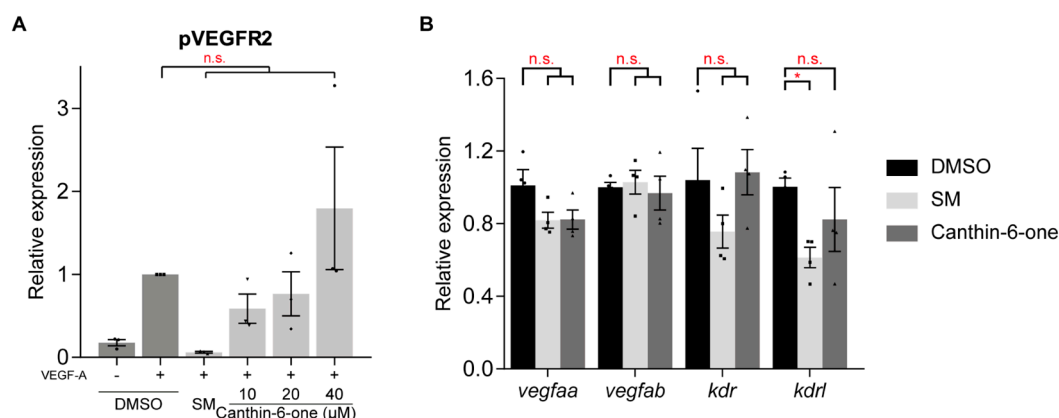

**Figure S5.** Canthin-6-one does not inhibit VEGFA-induced phosphorylation of VEGFR2 in HUVECs and *vegfa/vegfr2* expression in zebrafish. **(A)** Densitometry analysis of pVEGFR2 protein levels from western blot analysis in Figure 3E. pVEGFR2 protein level was normalised to total VEGFR2 protein level. **(B)** qPCR analysis of expression levels of *vegfaa*, *vegfab*, *kdr*, or *kdr1* in 48 hpf zebrafish embryos treated with either 0.2% DMSO, 20 μM SM, or 20 μM canthin-6-one from 16 hpf (n = 3). All data were normalised to *actb1* mRNA level. Statistical test: Kruskal-Wallis test was conducted for graphs **(A,B)**.  $p \leq 0.05$  (\*),  $p > 0.05$  (not significant, n.s.).

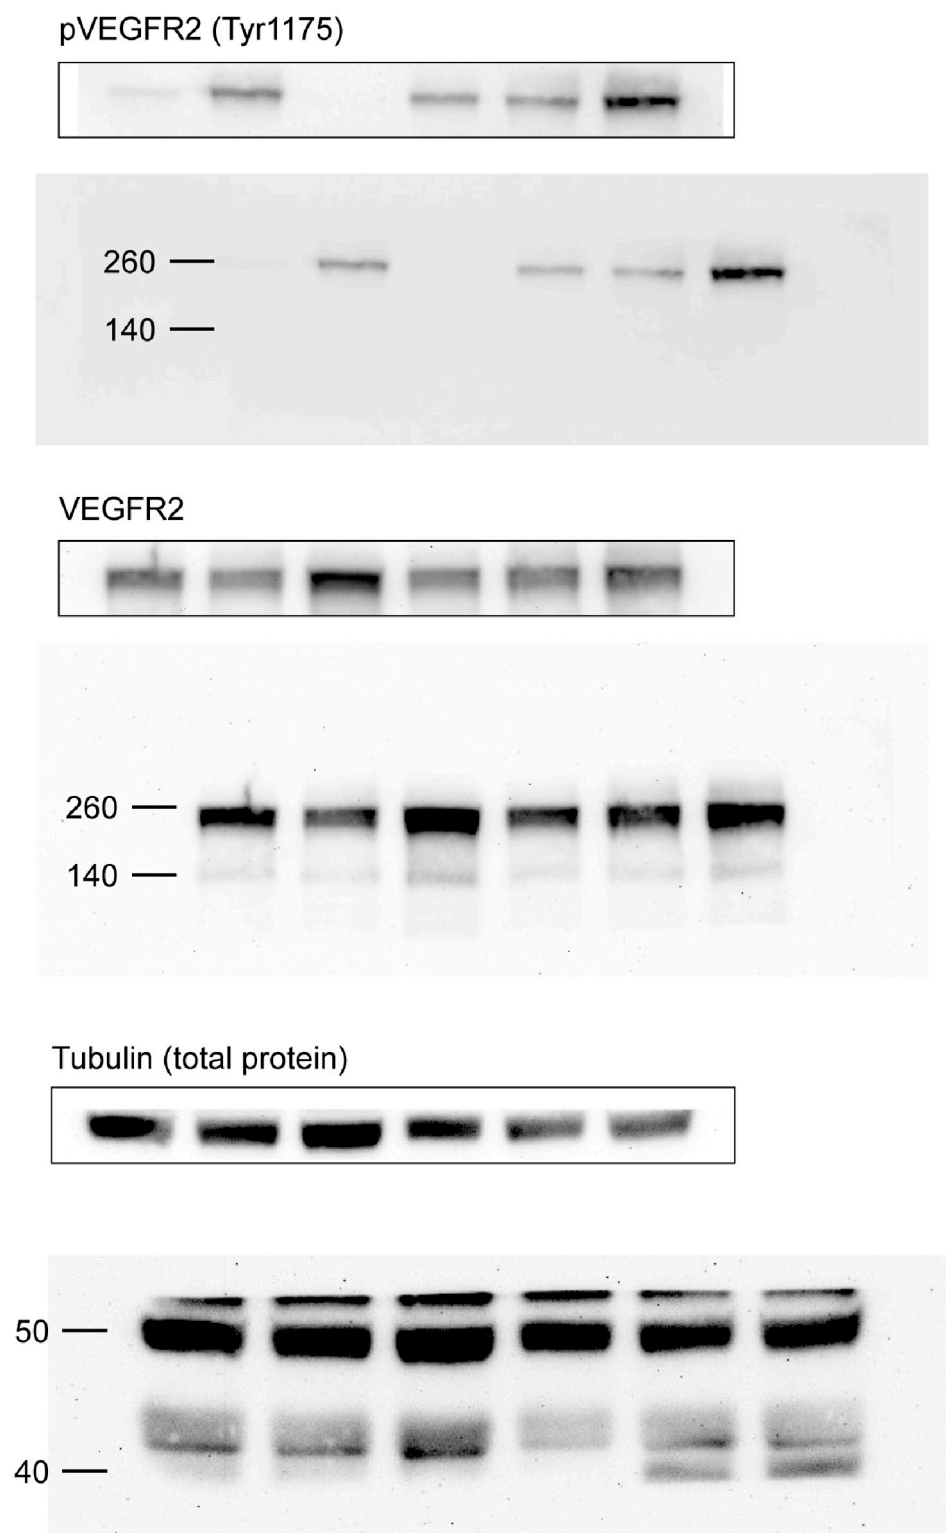

**Figure S6.** Original western blot images of Figure 3E. Images were taken using the Chemilmager™ imaging system (Alpha Innotech, CA, USA). Original western blot images were processed using the Fiji image processing software.

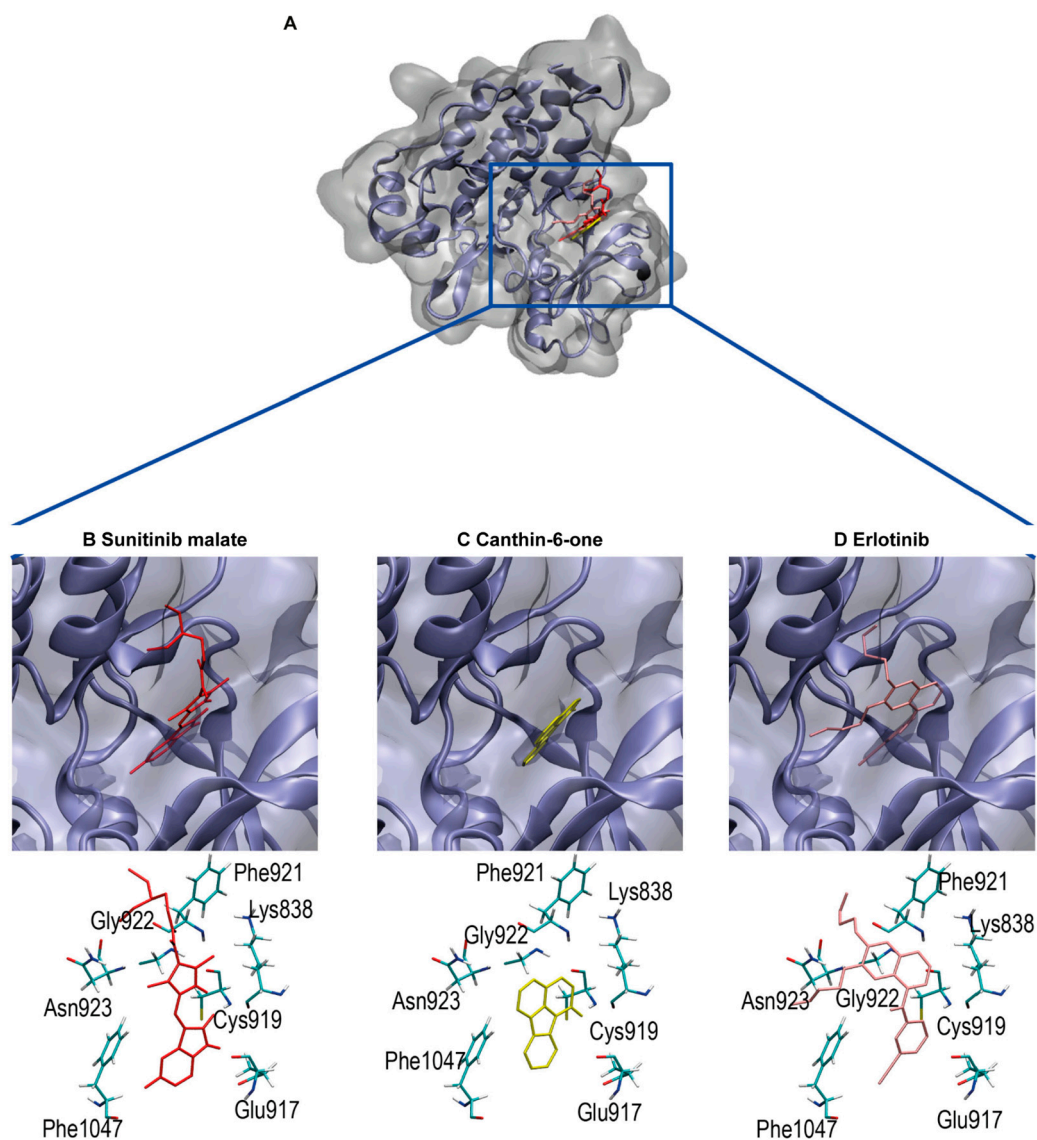

**Figure S7.** Canthin-6-one does not bind efficiently with VEGFR2. **(A-D)** Potential interacting residues at the binding sites of VEGFR2 **(A)** with sunitinib malate (SM, red, **B**), canthin-6-one (yellow, **C**), or erlotinib (pink, **D**).
